# Supplementary material
Source: HighWire-hosted journal article supplement (https://bmjopen.bmj.com/content/8/5/e018471)
Supplement: inline-supplementary-material-1 [file inline-supplementary-material-1.pdf]

## HIGH DOSE MET 80-90 MINUTES | NAME:

[illegible]

## HIGH DOSE MET 80-90 MINUTES | NAME:

[illegible]

## HIGH DOSE MET 80-90 MINUTES | NAME:

[illegible]
