# Supplementary material
Source: HighWire-hosted journal article supplement (https://bmjopen.bmj.com/content/8/5/e018471)
Supplement: inline-supplementary-material-2 [file inline-supplementary-material-2.pdf]

### Low dose MET 30 minutes

Name: \_\_\_\_\_

[illegible]

## Exercise program MET 30 minutter

Name: \_\_\_\_\_

[illegible]

## Exercise program MET 30 minutter

Name: \_\_\_\_\_

[illegible]
